# Supplementary material for: Low temperature synthesis of water dispersible F-doped TiO2 nanorods with enhanced photocatalytic activity
Source: Royal Society of Chemistry journal article supplement (doi:10.1039/c7ra00850c), 2017-01-01
Supplement: c7ra00850c1.pdf [file c7ra00850c1.pdf]

## Low Temperature Synthesis of Water Dispersible F-doped TiO<sub>2</sub>

### Nanorods with Enhanced Photocatalytic Activity

Jiaxu Zhao,<sup>a</sup> Wenting Li,<sup>a</sup> Xue Li,<sup>a,\*</sup> Xiaokai Zhang<sup>b</sup>

#### Supporting Information

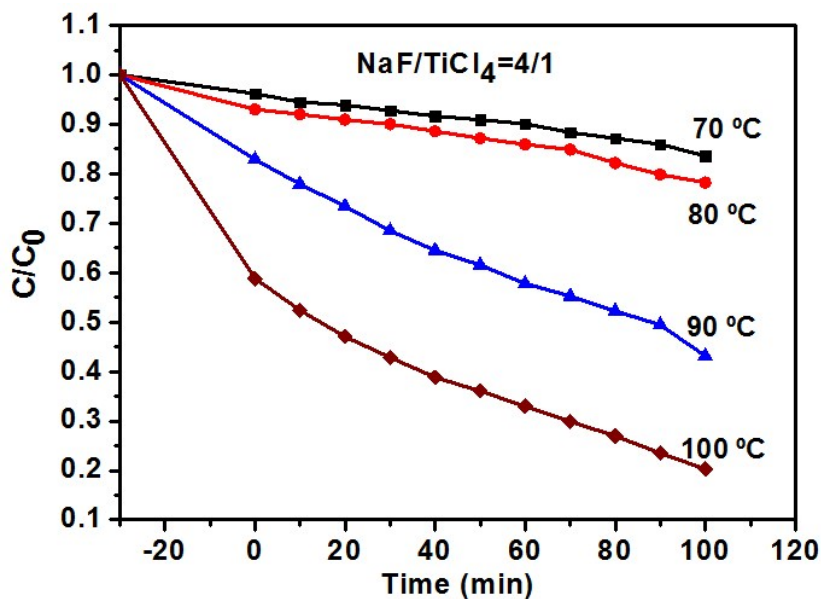

Fig. S1. UV-vis spectra of MB solution under UV irradiation for different times using F-TiO<sub>2</sub> NRs as photocatalyst prepared at different refluxing temperature (the NaF/TiCl<sub>4</sub> molar ratio was 4/1).

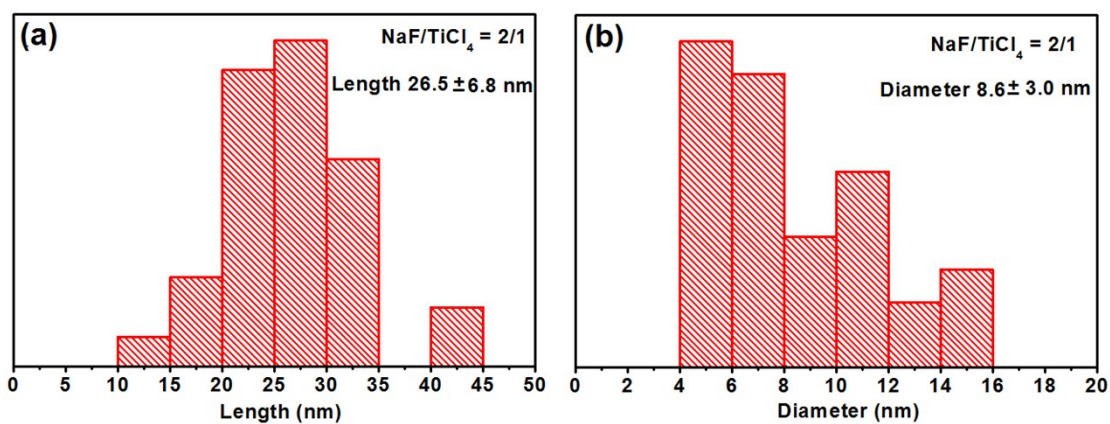

Fig. S2. length and diameter distributions of F-TiO<sub>2</sub> NRs. The molar ratio of NaF/TiCl<sub>4</sub> was 2.0/1.0.

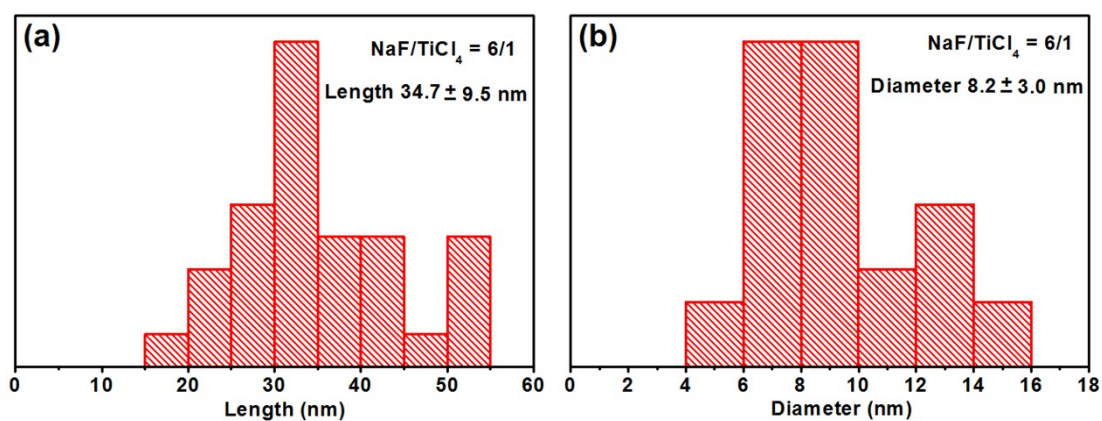

Fig. S3. length and diameter distributions of F-TiO<sub>2</sub> NRs. The molar ratio of NaF/TiCl<sub>4</sub> was 6.0/1.0.

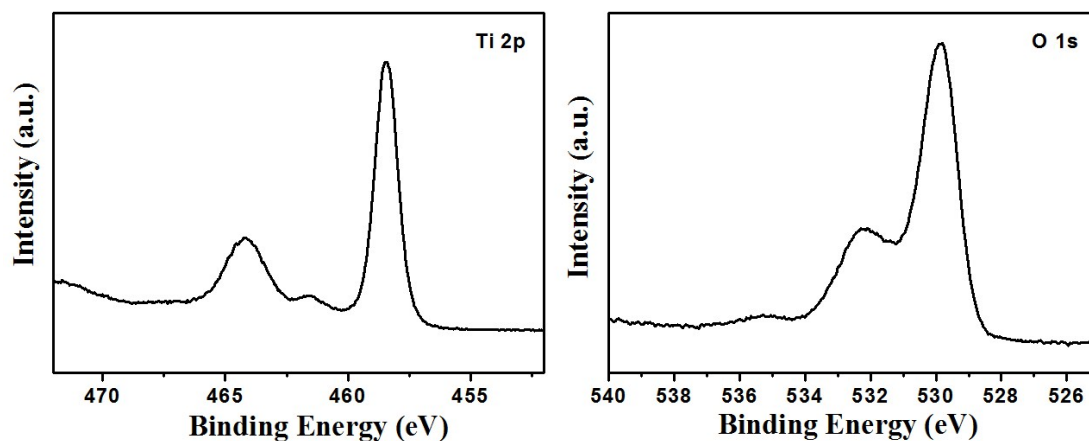

Fig. S4. X-ray photoelectron spectra of Ti 2p and O 1s recorded from F-TiO<sub>2</sub> NRs after washing with NaOH solution. The molar ratio of NaF/TiCl<sub>4</sub> was 4.0/1.0.
